# Supplementary material for: Biological efficacy of simulated radiolabeled Lipiodol® ultra-fluid and microspheres for various beta emitters: study based on VX2 tumors
Source: Springer Nature journal article supplement (doi:10.1186/s13550-023-01051-9), 2023-11-23
Supplement: MOESM1 [file 26349682]

Supplemental figure 1 : Radiomics boxplots for C group (n=3, no injection), L group (n=14, Lipiodol® ultra-fluid), M group (n=6, microspheres). Radiomics features calculated in the tumor with SlicerRadiomics extension of 3DSlicer.

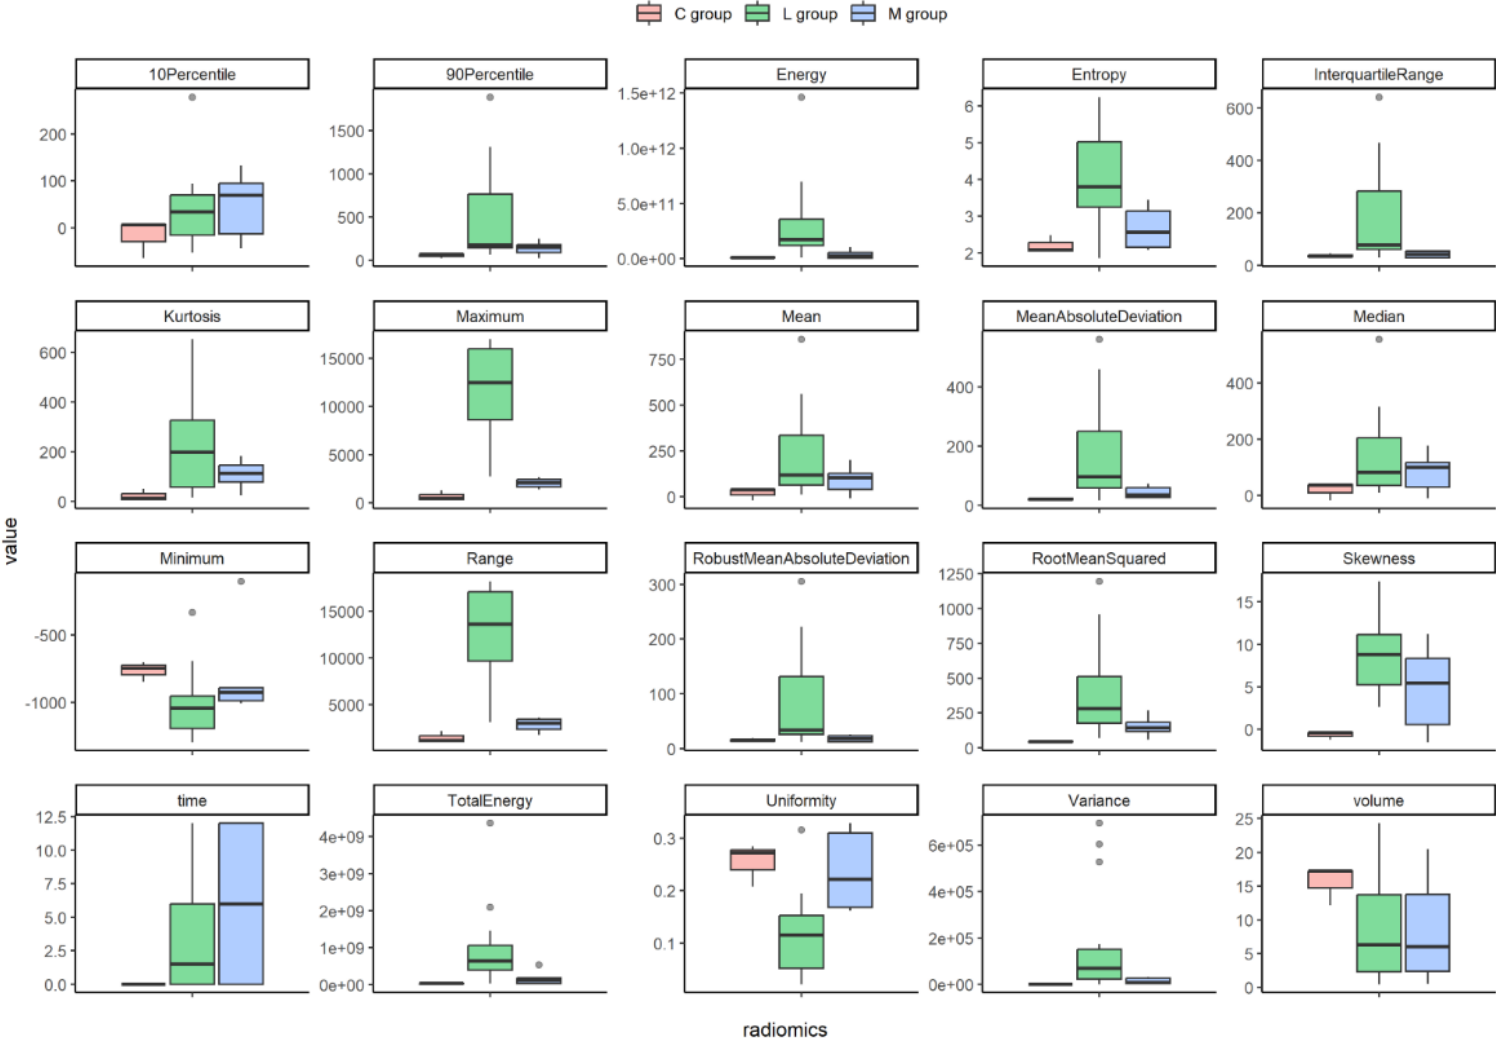

Supplemental figure 2: Correlation map for L group (n=14, Lipiodol® ultra-fluid). Radiomics features calculated in the tumor with SlicerRadiomics extension of 3DSlicer.

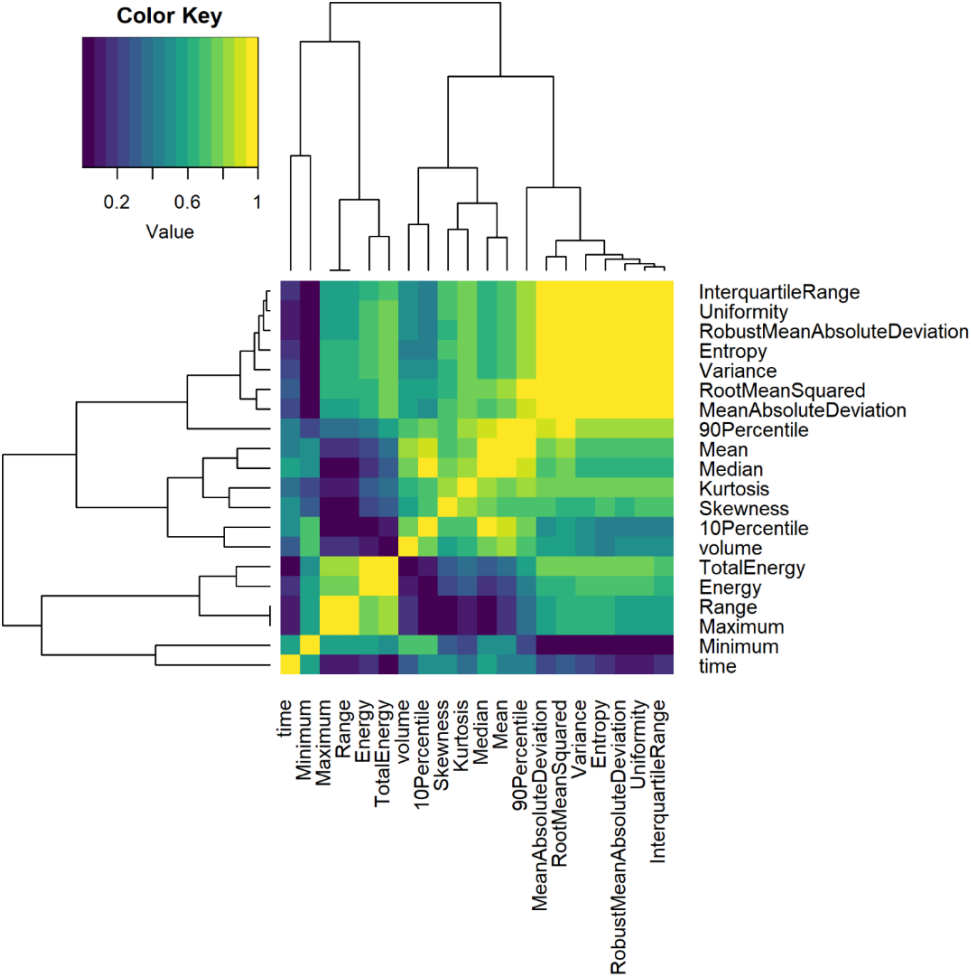

Supplemental figure 3: Correlation map for M group (n=6, microspheres). Radiomics features calculated in the tumor with SlicerRadiomics extension of 3DSlicer.

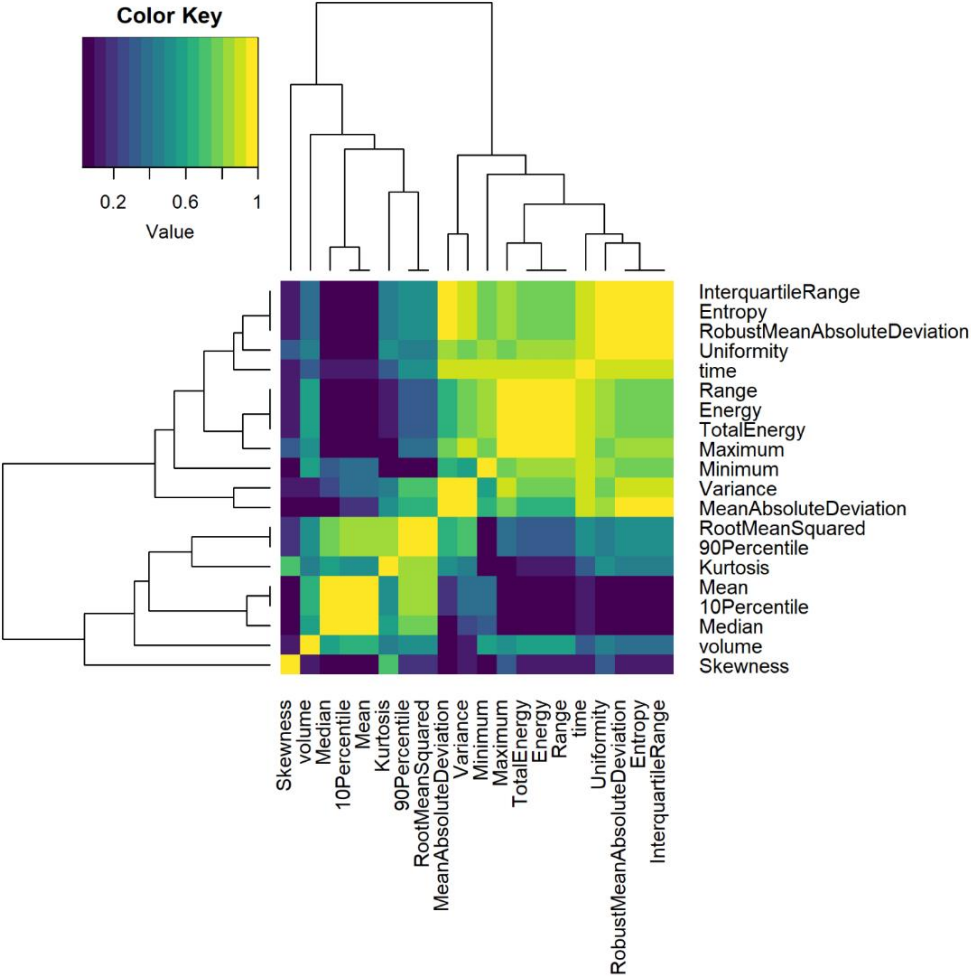

Supplemental figure 4: Dose volume histograms in Gy/MBq for all tumors explanted.

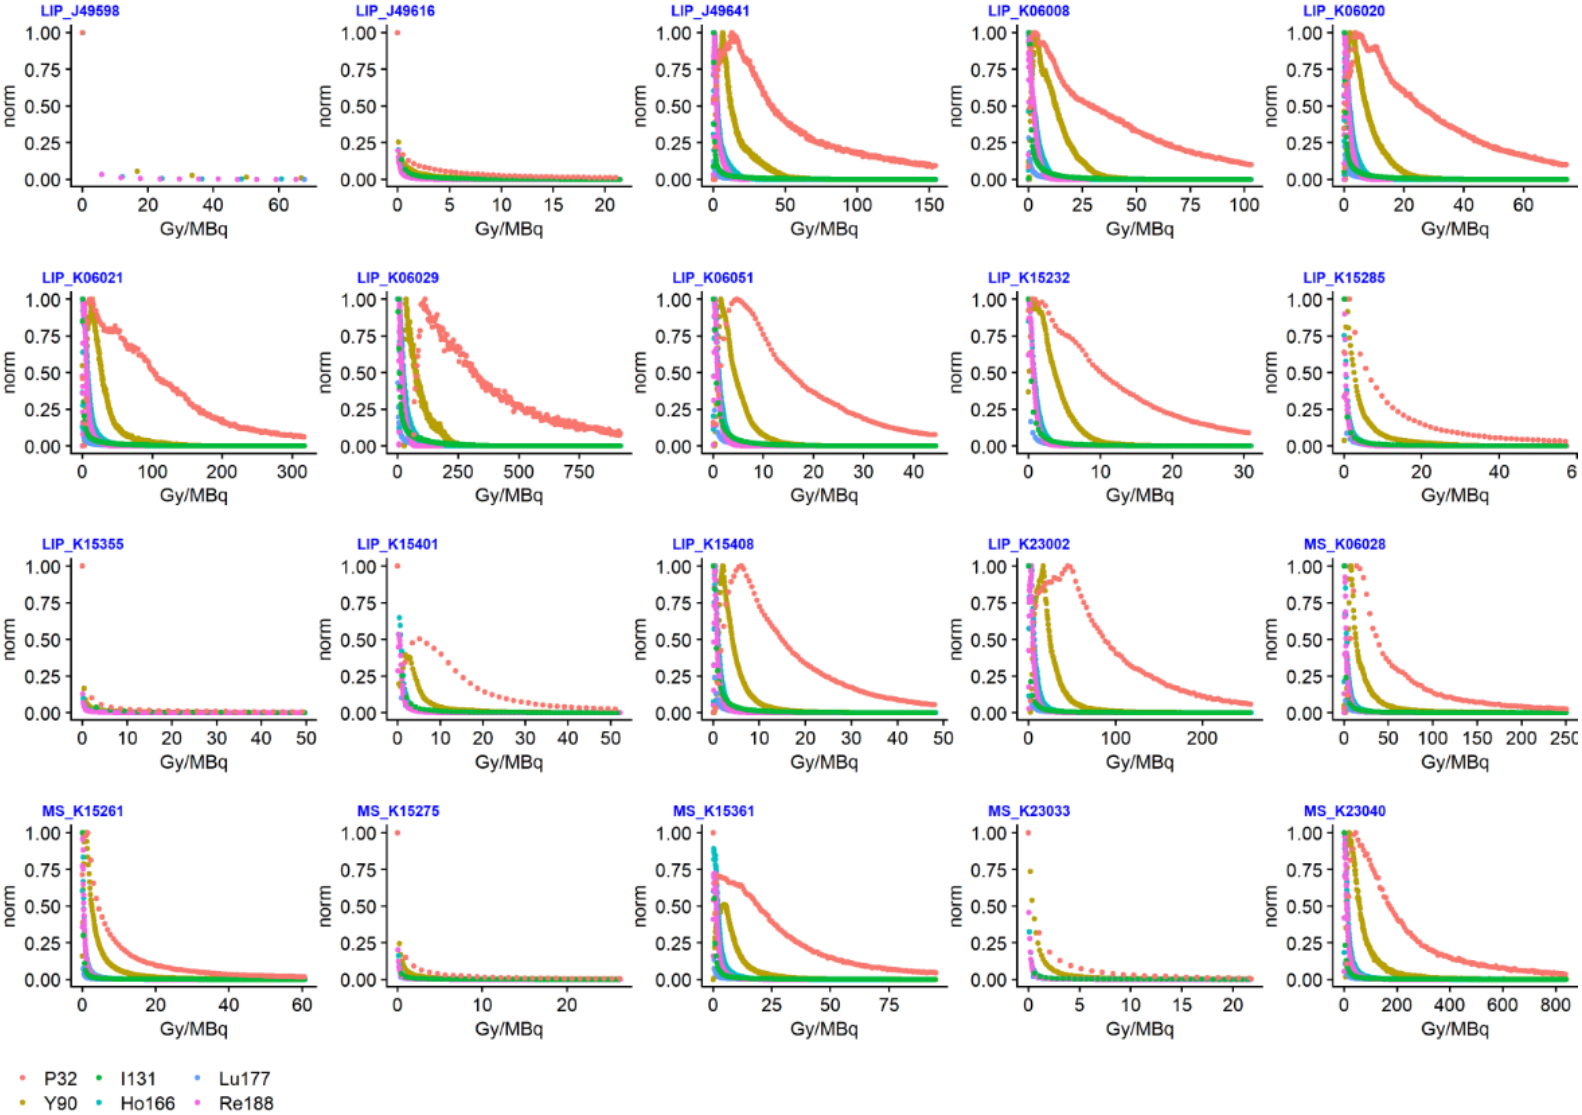

Supplemental table 1: S/ $\lambda$  values for the L and M groups and following radionuclides:  $^{32}\text{P}$ ,  $^{90}\text{Y}$ ,  $^{131}\text{I}$ ,  $^{166}\text{Ho}$ ,  $^{177}\text{Lu}$ ,  $^{188}\text{Re}$ . Wilcoxon p-values were calculated for each radionuclide between the L and M groups, with the null hypothesis.

|                                 | <i>S/<math>\lambda</math> (Gy.MBq<sup>-1</sup>)</i> |                 |                  |                   |                   |                   |
|---------------------------------|-----------------------------------------------------|-----------------|------------------|-------------------|-------------------|-------------------|
|                                 | $^{32}\text{P}$                                     | $^{90}\text{Y}$ | $^{131}\text{I}$ | $^{166}\text{Ho}$ | $^{177}\text{Lu}$ | $^{188}\text{Re}$ |
| <i>LIP_J49598</i>               | 27.2                                                | 8.38            | 3.93             | 1.96              | 2.63              | 1.55              |
| <i>LIP_J49616</i>               | 8.60                                                | 2.12            | 1.36             | 0.670             | 0.85              | 0.476             |
| <i>LIP_J49641</i>               | 61.8                                                | 14.3            | 11.1             | 4.86              | 7.10              | 3.35              |
| <i>LIP_K06008</i>               | 41.3                                                | 10.5            | 6.34             | 3.24              | 3.81              | 2.32              |
| <i>LIP_K06020</i>               | 29.7                                                | 6.88            | 5.18             | 2.33              | 3.29              | 1.61              |
| <i>LIP_K06021</i>               | 127                                                 | 29.1            | 23.4             | 10.0              | 15.27             | 6.88              |
| <i>LIP_K06029</i>               | 368                                                 | 85.6            | 63.7             | 28.9              | 41.15             | 20.0              |
| <i>LIP_K06051</i>               | 17.8                                                | 4.20            | 2.96             | 1.39              | 1.83              | 0.97              |
| <i>LIP_K15232</i>               | 12.4                                                | 3.02            | 1.95             | 0.963             | 1.19              | 0.68              |
| <i>LIP_K15285</i>               | 22.9                                                | 5.51            | 4.02             | 1.78              | 2.44              | 1.26              |
| <i>LIP_K15355</i>               | 19.9                                                | 5.08            | 3.29             | 1.56              | 2.07              | 1.12              |
| <i>LIP_K15401</i>               | 20.9                                                | 5.12            | 3.48             | 1.62              | 2.06              | 1.15              |
| <i>LIP_K15408</i>               | 19.3                                                | 4.52            | 3.30             | 1.51              | 2.09              | 1.05              |
| <i>LIP_K23002</i>               | 102                                                 | 24.0            | 16.9             | 7.98              | 10.87             | 5.56              |
| <i>Mean <math>\pm</math> sd</i> | 62.8 $\pm$ 94                                       | 14.9 $\pm$ 22   | 10.8 $\pm$ 16    | 4.92 $\pm$ 7.4    | 6.9 $\pm$ 11      | 3.43 $\pm$ 5.1    |
| <i>MS_K06028</i>                | 100                                                 | 23.9            | 17.3             | 7.87              | 11.3              | 5.49              |
| <i>MS_K15261</i>                | 24.3                                                | 5.75            | 3.99             | 1.90              | 2.58              | 1.33              |
| <i>MS_K15275</i>                | 10.5                                                | 2.43            | 1.83             | 0.823             | 1.20              | 0.57              |
| <i>MS_K15361</i>                | 38.0                                                | 8.81            | 6.48             | 2.98              | 4.15              | 2.06              |
| <i>MS_K23033</i>                | 8.70                                                | 2.10            | 1.41             | 0.676             | 0.922             | 0.477             |
| <i>MS_K23040</i>                | 336                                                 | 76.2            | 57.5             | 26.3              | 37.6              | 18.1              |
| <i>Mean <math>\pm</math> sd</i> | 86.3 $\pm$ 127                                      | 19.9 $\pm$ 29   | 14.7 $\pm$ 22    | 6.75 $\pm$ 9.9    | 9.6 $\pm$ 14      | 4.67 $\pm$ 6.8    |
| <i>Wilcoxon p</i>               | 1.0                                                 | 0.97            | 0.90             | 1.0               | 0.84              | 1.0               |
